# Supplementary material
Source: ML conference proceedings conference paper supplement (https://openreview.net/forum?id=pZtdVOQuA3)
Supplement: supplementary_material [file attachment]

---

# Differentiable Rendering with Reparameterized Volume Sampling

---

Anonymous Author(s)

Affiliation

Address

email

## Abstract

1 We propose an alternative rendering algorithm for neural radiance fields based  
2 on importance sampling. In view synthesis, a neural radiance field approximates  
3 underlying density and radiance fields based on a sparse set of scene views. To  
4 generate a pixel of a novel view, it marches a ray through the pixel and computes a  
5 weighted sum of radiance emitted from a dense set of ray points. This rendering  
6 algorithm is fully differentiable and facilitates gradient-based optimization of the  
7 fields. However, in practice, only a tiny opaque portion of the ray contributes most  
8 of the radiance to the sum. Therefore, we can avoid computing radiance in the rest  
9 part. In this work, we use importance sampling to pick non-transparent points on  
10 the ray. Specifically, we generate samples according to the probability distribution  
11 induced by the density field. Our main contribution is the reparameterization of  
12 the sampling algorithm. It allows end-to-end learning with gradient descent as in  
13 the original rendering algorithm. With our approach, we can optimize a neural  
14 radiance field with just a few radiance field evaluations per ray. As a result, we  
15 alleviate the costs associated with the color component of the neural radiance field  
16 at the additional cost of the density sampling algorithm.

## 17 1 Introduction

18 We propose a volume rendering algorithm for learning 3D scenes and generating novel views.  
19 Recently, learning-based approaches led to significant progress in this area. As an early instance,  
20 [8] proposed to represent a scene via a density field and a radiance (color) field parameterized  
21 with an MLP. They run a differentiable volume rendering algorithm with the MLP-based fields and  
22 minimize the discrepancy between the produced images and a set of reference images to learn a  
23 scene representation. The algorithm we propose is a drop-in replacement for the volume rendering  
24 algorithm used in NeRF [8] and follow-ups.

25 The underlying model in NeRF generates an image point in the following way. It casts a ray from  
26 a camera through the point and defines the point color as a weighted sum along the ray. The sum  
27 aggregates the radiance of each ray point with weights induced by the density field. Each summand  
28 involves a costly neural network query, and model has a trade-off between rendering quality and  
29 computational load. NeRF obtained a better trade-off with a two-stage sampling algorithm used to get  
30 ray points with higher weights. The algorithm is reminiscent of importance sampling, yet it requires  
31 training an auxiliary model.

32 In this work we propose a rendering algorithm based on importance sampling. Our algorithm also  
33 acts in two stages. In the first stage, it marches through the ray to estimate density. In the second  
34 stage, it constructs a Monte-Carlo color approximation using the density to pick points along the ray.  
35 The resulting estimate is fully-differentiable and does not require any auxiliary models. Besides that,  
36 we only need a few samples to construct precise color approximation. An intuitive explanation is that

we only need to compute the radiance of the point where a ray hits a solid surface. In the experiments, we query radiance for  $\times 16$  fewer ray points during training compared to baseline. Nevertheless, we manage to obtain competitive model and rendering quality.

As a result, our algorithm is more suitable for recent solutions [10, 13, 12] that use distinct models to parameterize radiance and density. Specifically, the first stage only queries the density field, whereas the second stage only queries the radiance field. Compared to the standard rendering algorithm, the second stage of our algorithm avoids redundant radiance queries and reduces the memory required for rendering.

## 2 Neural Radiance Fields

Neural radiance fields represent 3D scenes with a scalar density field  $\sigma : \mathbb{R}^3 \rightarrow \mathbb{R}^+$  and a vector radiance field  $c : \mathbb{R}^3 \times \mathbb{R}^3 \rightarrow \mathbb{R}^3$ . The scalar field  $\sigma$  represents volume density at each spatial location  $\mathbf{x}$ , and  $c(\mathbf{x}, \mathbf{d})$  returns the light emitted from spatial location  $\mathbf{x}$  in direction  $\mathbf{d}$  represented as a normalized three dimensional vector.

For novel view synthesis, they adapt a volume rendering technique that computes a pixel color  $C(\mathbf{o}, \mathbf{d})$  (denoted with a capital letter). In particular, the expected color along a ray  $\mathbf{r} = \mathbf{o} + t\mathbf{d}$  going from the camera through the pixel is

$$C(\mathbf{o}, \mathbf{d}) = \int_{t_n}^{+\infty} p_{\mathbf{r}}(t) c(\mathbf{o} + t\mathbf{d}, \mathbf{d}) dt, \text{ for } p_{\mathbf{r}}(t) = \sigma(\mathbf{o} + t\mathbf{d}) \exp\left(-\int_{t_n}^t \sigma(\mathbf{o} + s\mathbf{d}) ds\right). \quad (1)$$

Here,  $p_{\mathbf{r}}(t)$  is a probability density function of a random variable  $T$  on a ray  $\mathbf{r}$ . Intuitively,  $T$  is the location on the ray where a portion of light coming into the point  $\mathbf{o}$  was emitted.

One way to approximate to the integral would be to cut off the integral at depth  $t_f$  and then use a grid  $t_n = t_0 < t_1 < \dots < t_m = t_f$  to compute the integral with a Riemann sum

$$\hat{C}_{\text{Riemann}}(\mathbf{o}, \mathbf{d}) = \sum_{i=1}^m (t_i - t_{i-1}) p_{\mathbf{r},i} c(\mathbf{o} + t_i \mathbf{d}, \mathbf{d}), \quad (2)$$

$$\text{where } p_{\mathbf{r},i} = \sigma(\mathbf{o} + t_i \mathbf{d}) \exp\left(-\sum_{j=1}^i (t_j - t_{j-1}) \sigma(\mathbf{o} + t_j \mathbf{d})\right). \quad (3)$$

Importantly, Eq 2 is fully differentiable and can be used as a part of gradient-based learning pipeline.

While such approximation works in practice, a faithful approximation requires a dense grid and multiple evaluations of  $\sigma$  and  $c$ . Besides that, a common situation is when a ray intersects a solid surface at some point  $s \in [t_n, t_f]$ . In this case, probability density  $p_{\mathbf{r}}(t)$  will concentrate its mass near  $s$  and will be close to zero in other parts of the ray. As a result, most of the summands in Eq. 2 will make negligible contribution to the sum.

Monte Carlo methods give another way to approximate the color. Given  $n$  i.i.d. samples  $t_1, \dots, t_n \sim p_{\mathbf{r}}(t)$ , the color estimate is gathered by

$$\hat{C}_{MC}(\mathbf{o}, \mathbf{d}) = \frac{1}{m} \sum_{i=1}^m c(\mathbf{o} + t_i \mathbf{d}, \mathbf{d}). \quad (4)$$

Due to the importance sampling with distribution  $p_{\mathbf{r}}(t)$ , each term in Eq 4 contributes equally to the sum as the samples come from regions with non-negligible density. Unlike the grid estimate in Eq. 2, the Monte-Carlo estimate depends on the scene density  $\sigma$  implicitly and requires a custom gradient estimate for the parameters of  $\sigma$ . For instance, NeRF addresses the issue via a hierarchical sampling scheme. It trains a coarse model with a grid approximation to generate importance-weighted ray locations for a separate fine-grained model.

In the next section, we propose a novel principled approach to training neural radiance fields with importance-weighted color approximation as in Eq. 4.

### 3 Learning with Stochastic Color Estimates

In this section, we will discuss stochastic approximations to the expected color  $C(\mathbf{o}, \mathbf{d})$  in detail. Recall that  $C(\mathbf{o}, \mathbf{d}) = \mathbb{E}_T c(\mathbf{o} + T\mathbf{d}, \mathbf{d})$ , where  $T$  is a random variable with density specified in Eq. 1. Even though density  $p_{\mathbf{r}}(t)$  involves an integral we cannot compute in closed form, below we first assume that we have an algorithm to compute  $\int_{t_n}^t \sigma_{\mathbf{r}}(s)ds$  used in  $p_{\mathbf{r}}(t)$ .

Given a groundtruth expected color  $C_{gt}$ , optimization objective in NeRF captures the difference  $L(\hat{C}(\mathbf{o}, \mathbf{d}), C_{gt})$  between  $C_{gt}$  and the estimated color  $\hat{C}(\mathbf{o}, \mathbf{d})$ . To reconstruct a scene NeRF runs a gradient based optimizer to minimize the objective averaged across multiple rays and multiple viewpoints. Such approach works for grid estimate  $\hat{C}(\mathbf{o}, \mathbf{d}) = \hat{C}_{Riemann}(\mathbf{o}, \mathbf{d})$  that depends on density  $\sigma_{\mathbf{r}}$  explicitly, but Monte-Carlo estimate  $\hat{C}_{MC}(\mathbf{o}, \mathbf{d})$  of the expectation depends on  $\sigma$  implicitly and a naive automatic differentiation algorithm will return zero gradients.

In the rest of the section, we first introduce an algorithm to compute  $\hat{C}_{MC}(\mathbf{o}, \mathbf{d})$  and derive a gradient estimate for the algorithm. Then, we conclude with a discussion our implementation of the estimate. To ease the notation, we will also introduce  $\sigma_{\mathbf{r}}(t) = \sigma(\mathbf{o} + t\mathbf{d})$  and  $c_{\mathbf{r}}(t) = c(\mathbf{o} + t\mathbf{d}, \mathbf{d})$  to denote fields restricted to a ray  $\mathbf{r} = \mathbf{o} + t\mathbf{d}$ .

#### 3.1 Estimate Reparameterization

To make the dependence of  $\hat{C}(\mathbf{o}, \mathbf{d})$  on  $\sigma_{\mathbf{r}}$  explicit, we change the variables in the expectation  $\mathbb{E}_T c_{\mathbf{r}}(T)$ . For  $F(t) = 1 - \exp\left(-\int_{t_n}^t \sigma_{\mathbf{r}}(s)ds\right)$  and  $y := F(t)$  we write

$$\mathbb{E}_T c_{\mathbf{r}}(T) = \int_{t_n}^{+\infty} c_{\mathbf{r}}(t)p_{\mathbf{r}}(t)dt = \int_{y_n}^{y_f} c_{\mathbf{r}}(F^{-1}(y))dy. \quad (5)$$

Function  $F(t)$  acts as cumulative distribution function of the variable  $T$  with a single exception that, in general,  $y_f = \lim_{t \rightarrow \infty} F(t) \neq 1$ . In volume rendering,  $F(t)$  is called the opacity function with  $y_f$  being equal to pixel opaqueness. Bounds of integration are where  $y_n = F(t_n) = 0$  and  $y_f = \lim_{t \rightarrow +\infty} F(t)$ . For simplicity, below we replace  $y_f$  with  $F(t_f)$  where  $t_f$  is the maximum ray depth.

In the right-hand side of Eq. 5, integration boundaries depend on the opacity  $F$  and, thus, on the volume density  $\sigma_{\mathbf{r}}$ . We further simplify the integral by changing the integration boundaries to  $[0, 1]$ :

$$\int_{y_n}^{y_f} c_{\mathbf{r}}(F^{-1}(y))dy = \int_0^1 (y_f - y_n)c_{\mathbf{r}}(F^{-1}(y_n + (y_f - y_n)u))du. \quad (6)$$

With this, we arrive to the following reparameterized Monte-Carlo estimate of the expected color obtained with i.i.d  $U[0, 1]$  samples  $u_1, \dots, u_m$ :

$$\hat{C}_{MC}^R(\mathbf{o}, \mathbf{d}) := \frac{1}{m} \sum_{i=1}^m (y_f - y_n)c_{\mathbf{r}}(F^{-1}(y_n + (y_f - y_n)u_i)). \quad (7)$$

In the above estimate sampling does not depend on volume density  $\sigma_{\mathbf{r}}$  or color  $c_{\mathbf{r}}$ . Essentially, this is a reparameterized Monte-Carlo estimate that generates samples from  $p_{\mathbf{r}}(t)$  using the inverse cumulative distribution function  $F^{-1}(y_n + (y_f - y_n)u)$ .

We further improve the estimate using stratified sampling. To do this, we replace the uniform samples  $u_1, \dots, u_m$  with uniform independent samples within regular grid bins  $v_i \sim U[\frac{i-1}{m+1}, \frac{i}{m+1}]$ ,  $i = 1, \dots, m$  and derive a reparameterized (R) stratified (S) Monte Carlo estimate

$$\hat{C}_{SMC}^R(\mathbf{o}, \mathbf{d}) = \frac{1}{m} \sum_{i=1}^m (y_f - y_n)c_{\mathbf{r}}(F^{-1}(y_n + (y_f - y_n)v_i)). \quad (8)$$

It is easy to show that both 7 and 8 are unbiased estimates of 1.

Next, we will discuss algorithms used to compute the inverse opacity function  $F^{-1}(y)$  and compute the gradients of the function with automatic differentiation.

### 3.2 Implementation of Inverse Opacity for Volume Sampling

To compute the estimates in Eqs. (7) and (8), we need to compute the inverse opacity  $F^{-1}(y)$  along with its gradient. In practice, we start with a black-box density field  $\sigma_r(x)$  and compute the induced density  $p_r(t)$  and opacity  $F(t)$  on a ray  $r$  via approximations. Assuming we have an algorithm to compute  $\int_{t_n}^t \sigma_r(s)ds$ , below we show how to implement the inverse opacity  $F^{-1}$ .

We invert  $F(t) = 1 - \exp\left(-\int_{t_n}^t \sigma_r(s)ds\right)$  with binary search. Note that  $F(t)$  is a monotonic function and for  $y \in (y_n, y_f) = (F(t_n), F(t_f))$  the inverse lies in  $(t_n, t_f)$ . To compute  $F^{-1}(y)$ , we start with boundaries  $t_l = t_n$  and  $t_r = t_f$  and gradually decrease the gap between the boundaries based on the comparison of  $F(\frac{t_l+t_r}{2})$  with  $y$ . Importantly, such procedure is easy to parallelize across multiple inputs and multiple rays.

However, we cannot backpropagate through the binary search iterations and need a workaround to compute the gradient  $\frac{\partial t}{\partial \theta}$  of  $t(\theta) = F^{-1}(y, \theta)$ . To do this, we compute differentials of the right and the left hand side of equation  $y(\theta) = F(t, \theta)$

$$\frac{\partial y}{\partial \theta} d\theta = \frac{\partial F}{\partial t} \frac{\partial t}{\partial \theta} d\theta + \frac{\partial F}{\partial \theta} d\theta. \quad (9)$$

By the definition of  $F(t, \theta)$  we have

$$\frac{\partial F}{\partial t} = (1 - F(t, \theta))\sigma_r(t, \theta), \quad (10)$$

$$\frac{\partial F}{\partial \theta} = (1 - F(t, \theta)) \frac{\partial}{\partial \theta} \left( \int_{t_n}^t \sigma_r(s, \theta) ds \right). \quad (11)$$

We solve Eq. 9 for  $\frac{\partial t}{\partial \theta}$  and substitute the partial derivatives using Eqs. (10) and (11) to obtain the final expression for the gradient

$$\frac{\partial t}{\partial \theta} = \frac{\frac{\partial y}{\partial \theta} - (1 - F(t, \theta)) \frac{\partial}{\partial \theta} \int_{t_n}^t \sigma_r(s, \theta) ds}{(1 - F(t, \theta))\sigma_r(t, \theta)}. \quad (12)$$

In our implementation, we use automatic differentiation to compute  $\partial y / \partial \theta$  and  $\frac{\partial}{\partial \theta} \int_{t_n}^t \sigma(s)ds$  to combine the results as in Eq. 12.

### 3.3 Computing Opacity in Practice

To describe the sampling procedure, we assumed that we have an oracle for computing  $\int_{t_n}^t \sigma_r(s)ds$  along with its gradient. The integral is required to compute opacity  $F(t)$ . In this work, we consider an arbitrary volumetric density  $\sigma(s)$  and approximate it with a linear spline on a ray  $r = o + td$  to sample the points on the ray. Specifically, we take a grid  $t_0 < \dots < t_m$  and compute  $\sigma_r(t_0), \dots, \sigma_r(t_m)$  to construct the spline  $\hat{\sigma}_r(s)$  (Fig. 1). For the piecewise linear function  $\hat{\sigma}_r(x)$  we can compute the integral  $\int_{t_n}^t \hat{\sigma}_r(s)ds$  in a closed form. Additionally, we can backpropagate the gradients through the approximation to compute the gradients of knots  $\sigma_r(t_0), \dots, \sigma_r(t_m)$ . Thus, we obtain a differentiable rendering algorithm for an arbitrary density field  $\sigma$ . Besides that, some recent works parameterize

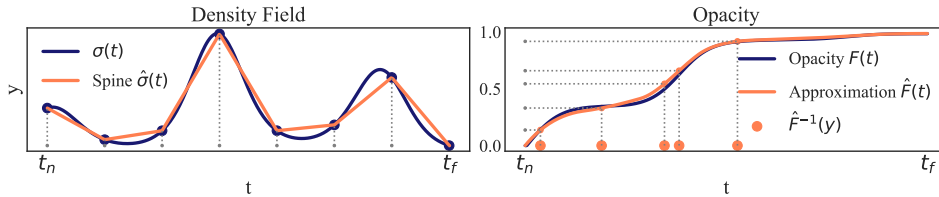

Figure 1: Illustration of opacity inversion. We approximate an arbitrary density field  $\sigma$  with a linear spline(left). Then we use the spline to approximate opacity  $\hat{F}(t)$  and compute  $\hat{F}^{-1}(y)$  (right).

density fields through voxel grids. For a voxel grid, when  $\sigma_r$  is a trilinear interpolation of the grid values, we can compute the integral in a closed form.



## 4 Related Work

**Neural Radiance Fields & Efficient Sampling** Even in the original work on neural radiance fields [8] the authors aimed to find an efficient sampling algorithm for volume rendering. Our importance sampling approach is reminiscent of their hierarchical sampling solution. On the first stage, they use an auxiliary model on a sparse grid. Then they use the predicted densities to generate a dense grid with an importance sampling-like algorithm. As opposed to NeRF, we compute density on a dense grid at the first stage and then use a sparse set of samples to evaluate radiance on the second stage. Our algorithm also allows training without auxiliary models.

Several recent follow-up works also aimed to improve NeRF rendering time and overall efficiency. Most of these works consider trainable encoding  $\theta$  and utilize some efficient data structure to make each evaluation of multi-layered perceptron fast or avoid evaluating MLP at all. One of the earliest work in this direction was NSVF [7]. The authors proposed to use octree to store point-based embeddings and then estimate query point embedding with a trilinear interpolation and positional encoding. During training, the octree gradually increased resolution in the regions of interest and pruned the empty areas. However, this method still requires the time-consuming training of MLPs. Voxel-based embedding structure was further studied in recent works and it was shown that positional encoding doesn't affect model convergence - the network can be trained with fully trainable embedding without any encoding. And also, what is more important, such a structure allows for making neural network (MLP) shallower and consequently faster. Following this idea, DirectVoxGo [12] proposes to avoid MLP at all in density computation, while Instant Neural Graphic Primitives [10] uses it to solve hash collisions. When density field is a piecewise linear we can compute opacity in a closed-form.

**Reparameterization Trick & Implicit Differentiation** Our solution is inspired by the literature on deep latent variable models [6, 11] and approximate inference. In this area, models often contain an internal sampling algorithm with parameters we need to optimize. The now-common approach for continuous random variables is the reparameterization trick, which we apply in our setup. The authors of [9] give a comprehensive overview of the area state.

A closely related work in the context of deep variable models is [4]. They were first to apply implicit differentiation to estimate gradients for the reparameterization trick. While we use the implicit differentiation to compute the gradient of binary search output, the same approach applies to other iterative algorithms. The examples include ODE solves [3], fixed-point iterators [1] and optimization algorithms.

## 5 Experiments

### 5.1 Importance Sampling for a Single Ray

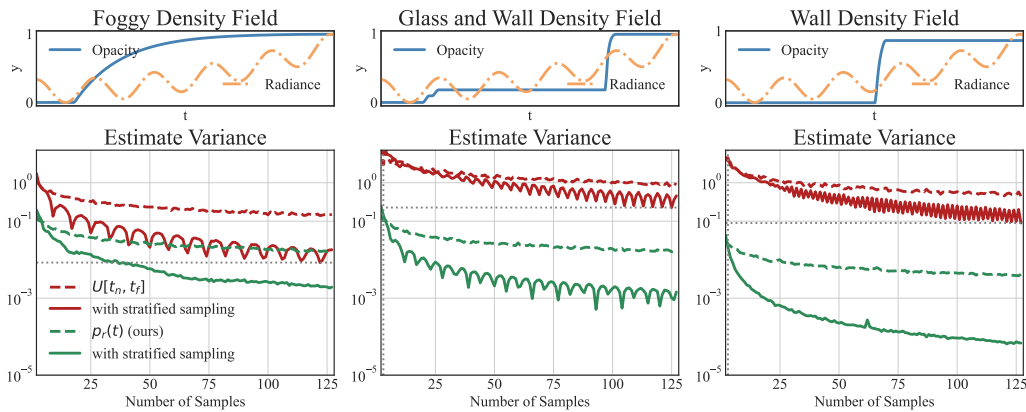

Figure 2: Color estimate variance compared for a varying number of samples. The upper plot illustrates underlying opacity function on a ray; the lower graph depicts variance in logarithmic scale. Our importance sampling approach (solid green) has significantly lower deviation than a stratified baseline (solid red) typically used in volume rendering.

We begin with an evaluation of color estimates in a one-dimensional setting. Our experiment models light propagation on a single ray in three typical situations. The upper row of Fig. 2 defines a scalar radiance field (orange)  $c(t)$  and opacity functions (blue)  $F(t)$  for

- "Foggy" density field. It models a semi-transparent volume. Similar fields occur after model initialization during density field training;
- "Glass and wall" density field. Models light passing through nearly transparent volumes such as glass. The light is emitted at three points: the inner and outer surface of the transparent volume and an opaque volume near the end of the ray;
- "Wall" density field. Light is emitted from a single point on a ray. Such fields are most common in applications.

For the three fields we estimated the expected radiance  $C = \int_{t_n}^{t_f} c(t) dF(t)$ . We considered two baseline methods (both in red in Fig. 2): the first was a Monte Carlo estimate of  $C$  obtained with  $U[t_n, t_f]$  samples, the second was a stochastic modification of Eq. 2 using a grid  $t_n = t_0 < \dots < t_m = t_f$ :

$$\hat{C} = \sum_{i=1}^m (t_i - t_{i-1}) c(\tau_i) \frac{dF}{dt} \Big|_{t=\tau_i}, \text{ with independent } \tau_i \sim U[t_i - 1, t_i]. \quad (13)$$

In other terms, the second baseline uses stratified sampling to reduce the baseline Monte Carlo estimate variance. Eq 13 is an instance of a vanilla volume rendering algorithm one may encounter in practice. We compared the baseline against estimate from Eq. eq. (7) and its stratified counterpart from Eq. 8. All estimates are unbiased. Therefore, we only compared the estimates variances for a varying number of samples  $m$ .

In all setups, our stratified estimate uniformly outperformed the baselines. For the most challenging "foggy" field, approximately  $m = 32$  samples we required to match the baseline performance for  $m = 128$ . We matched the baseline with only a  $m = 4$  samples for other fields. Importance sampling requires only a few points for degenerate distributions. In further experiments, we take  $m = 8, 32$  to obtain a precise color estimate even when a model did not converge to a degenerate distribution.

## 5.2 Scene Reconstruction with Reparameterized Volume Sampling

Next, we apply our algorithm to 3D scene reconstruction based on a set of image projections. As a benchmark, we use the common Lego dataset. The primary goal of the experiment is to demonstrate computational advantages of our algorithm compared to a basic volume rendering baseline.

As a starting point, we took the original NeRF's MLP [8] with eight layers used to compute density and radiance. Then we modified the architecture to use only three first layers to compute the density field. When the density field is queried, we only compute the first three layers, while for the radiance we compute the whole network. Even though such modification may have put additional limitations on the density model, it illustrates the benefit of using fewer radiance queries. For density, we used softplus activation to ensure its positivity, while for the radiance we used sigmoid activation to ensure that the output will be a valid RGB image.

In our experiment, we did not reproduce the expensive hierarchical sampling used in NeRF and trained a single model in all experiments. Our baseline calculated color using Eq. ???. We took a dense grid of  $m = 128$  points along each ray and trained the model using Huber loss with the ground truth colors and the predict colors. We additionally perturbed the grid to regularize the model. We used Adam [5] optimizer for training and decayed the learning rate during 100 epochs of training from  $3e-4$  to  $3e-7$  following MIP-NeRF's scheduler [2] with image batch size equal 8 and each epoch consisting of 8000 batches. To form a training batch, for each image in an image batch we selected 375 pixels and calculated loss over them.

We evaluated the importance sampling-based rendering algorithm with the same architecture and hyperparameters as with the baseline model. We used the same algorithm to sample a dense grid of  $m = 128$  points to query the density field and construct an approximating spline. Then we calculated color approximation with Eq. 8 with  $m' = \{8, 32\}$  samples from the inverse cumulative density function approximated by the spline.

| Model                         |            | PSNR ( $\uparrow$ ) | SSIM ( $\uparrow$ ) | LPIPS (alex) [14]( $\downarrow$ ) |
|-------------------------------|------------|---------------------|---------------------|-----------------------------------|
| Baseline                      |            | 27.247              | 0.904               | 0.1138                            |
| Splines, #pts in estimation 8 |            |                     |                     |                                   |
| Training                      | Validation |                     |                     |                                   |
| 8 pts                         | 1 pts      | 23.377              | 0.822               | 0.1819                            |
| 8 pts                         | 2 pts      | 25.193              | 0.858               | 0.1449                            |
| 8 pts                         | 4 pts      | 26.210              | 0.883               | 0.1215                            |
| 8 pts                         | 8 pts      | 26.502              | 0.892               | 0.1243                            |
| 8 pts                         | 16 pts     | 26.570              | 0.894               | 0.1333                            |
| 8 pts                         | 32 pts     | 26.585              | 0.895               | 0.1369                            |
| 32 pts                        | 1 pts      | 22.519              | 0.805               | 0.2050                            |
| 32 pts                        | 2 pts      | 24.902              | 0.846               | 0.1523                            |
| 32 pts                        | 4 pts      | 26.523              | 0.881               | 0.1181                            |
| 32 pts                        | 8 pts      | 27.100              | 0.897               | 0.1083                            |
| 32 pts                        | 16 pts     | 27.252              | 0.902               | 0.1167                            |
| 32 pts                        | 32 pts     | 27.286              | 0.904               | 0.1223                            |

Table 1: Ablation study and comparison with the baseline. Metrics are calculated over test views for Lego scene [8]

First, we compared the rendering quality of our algorithm against the baseline. Tab. 1 contains the quantitative results and figs. 3 and 4 contain qualitative results. From the rendering quality viewpoint (1), with  $m' = 32$  samples, our model works on par with the baseline, while with  $m' = 8$  samples it has slightly worse performance. Though we did not aim to reproduce the state-of-the-art results, we speculate that a better density model could improve the results even further. In Fig. ??, we compared the rendering performance of importance sampling for varying  $m'$ . Our algorithm produced sensible renders even for  $m' = 1$ , however noise artifacts only disappeared for  $m' = 32$ . Fig. 4 shows a stratified estimate renders (Eq. 8) along with a Monte Carlo renders (Eq. 7) for  $m' = 32$ . With the same rendering complexity, the variance reduction obtained via stratified sampling purges the rendering artifacts that a naive Monte Carlo estimate has.

| Model          | Iter/sec ( $\uparrow$ ) | Mem Usage ( $\downarrow$ ) |
|----------------|-------------------------|----------------------------|
| Baseline       | 3.90                    | 8.5 Gb                     |
| Splines 1 pts  | 4.89                    | 1.8 Gb                     |
| Splines 2 pts  | 5.06                    | 1.8 Gb                     |
| Splines 4 pts  | 4.88                    | 2.1 Gb                     |
| Splines 8 pts  | 4.53                    | 2.2 Gb                     |
| Splines 16 pts | 3.81                    | 2.5 Gb                     |
| Splines 32 pts | 2.98                    | 2.8 Gb                     |

Table 2: Speed & memory estimates. Iteration time is measured during training on GTX 1080 ti, memory usage is measured during inference with batch size equal 1024

Besides the rendering quality, we estimated the training speed and memory footprint of our algorithm in Tab. 2. For  $m' = 8$  training iterations were on average  $\times 1.2$  faster, while for  $m' = 32$  training iterations took  $\times 1.3$  more time. The difference occurred due to a varying number of radiance queries. For a memory footprint viewpoint, our algorithm used  $\times 3.0$  and  $\times 3.9$  less memory for  $m' = 32$  and  $m = 8$  correspondingly. With this, important sampling leaves room for further optimization as it allows to work with bigger batches with a moderate variability in rendering speed and quality.

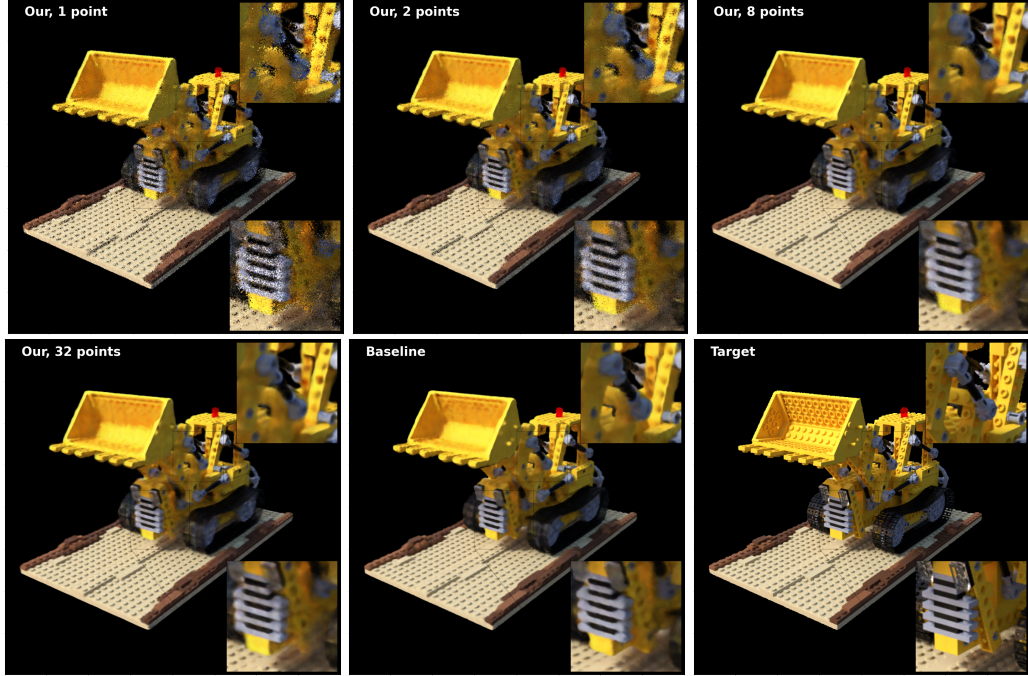

Figure 3: Rendering results with a different number of samples in the stratified estimate. From left to right and from top to down: 1, 2, 8, 32 points estimates, Baseline and Target for reference.

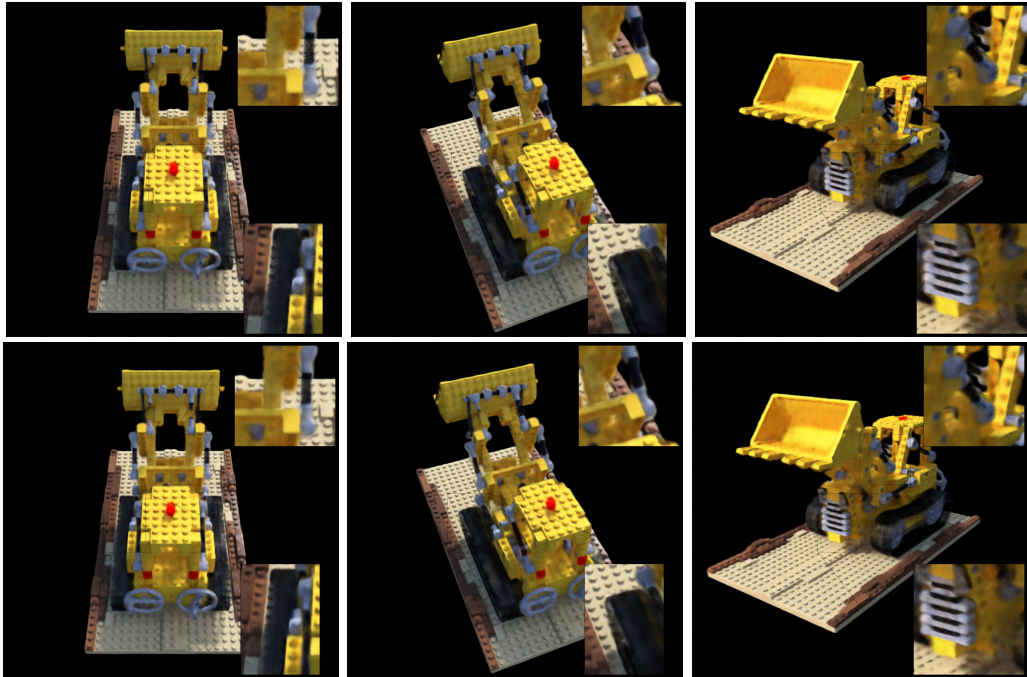

Figure 4: Comparison of rendering results from different viewing angles with Monte-Carlo estimate (top row) and stratified Monte-Carlo estimate (bottom row), both with 32 points along each ray

## 6 Conclusion

We proposed an alternative to classic volume rendering algorithms used in 3D scene reconstruction. For a synthetic experiment and in full-scale reconstruction task we achieve better estimation results in terms of variance with a significantly smaller computation footprint. In particular, our algorithm allows for significant memory reductions and even increased inference time. At the same time, we demonstrate competitive rendering quality. We believe that our approach is a promising alternative to standard volume rendering techniques.

### 6.1 Broader Impact

We hypothesize that models like NeRFs may be used in online stores for a better user experience. Then people will choose more suitable products. We are not aware of any possibilities to use this in a negative way. Furthermore, we are sure that the efficient sampling we proposed for 3D rendering may reduce computation costs and therefore environmental damage.

## References

- [1] Shaojie Bai, J Zico Kolter, and Vladlen Koltun. Deep equilibrium models. *Advances in Neural Information Processing Systems*, 32, 2019.
- [2] Jonathan T Barron, Ben Mildenhall, Matthew Tancik, Peter Hedman, Ricardo Martin-Brualla, and Pratul P Srinivasan. Mip-nerf: A multiscale representation for anti-aliasing neural radiance fields. In *Proceedings of the IEEE/CVF International Conference on Computer Vision*, pages 5855–5864, 2021.
- [3] Ricky TQ Chen, Yulia Rubanova, Jesse Bettencourt, and David K Duvenaud. Neural ordinary differential equations. *Advances in neural information processing systems*, 31, 2018.
- [4] Mikhail Figurnov, Shakir Mohamed, and Andriy Mnih. Implicit reparameterization gradients. *Advances in Neural Information Processing Systems*, 31, 2018.
- [5] Diederik P Kingma and Jimmy Ba. Adam: A method for stochastic optimization. *arXiv preprint arXiv:1412.6980*, 2014.
- [6] Diederik P Kingma and Max Welling. Auto-encoding variational bayes. *arXiv preprint arXiv:1312.6114*, 2013.
- [7] Lingjie Liu, Jiatao Gu, Kyaw Zaw Lin, Tat-Seng Chua, and Christian Theobalt. Neural sparse voxel fields. *Advances in Neural Information Processing Systems*, 33:15651–15663, 2020.
- [8] Ben Mildenhall, Pratul P Srinivasan, Matthew Tancik, Jonathan T Barron, Ravi Ramamoorthi, and Ren Ng. Nerf: Representing scenes as neural radiance fields for view synthesis. In *European conference on computer vision*, pages 405–421. Springer, 2020.
- [9] Shakir Mohamed, Mihaela Rosca, Michael Figurnov, and Andriy Mnih. Monte carlo gradient estimation in machine learning. *J. Mach. Learn. Res.*, 21(132):1–62, 2020.
- [10] Thomas Müller, Alex Evans, Christoph Schied, and Alexander Keller. Instant neural graphics primitives with a multiresolution hash encoding. *arXiv preprint arXiv:2201.05989*, 2022.
- [11] Danilo Jimenez Rezende, Shakir Mohamed, and Daan Wierstra. Stochastic backpropagation and approximate inference in deep generative models. In *International conference on machine learning*, pages 1278–1286. PMLR, 2014.
- [12] Cheng Sun, Min Sun, and Hwann-Tzong Chen. Direct voxel grid optimization: Super-fast convergence for radiance fields reconstruction. *arXiv preprint arXiv:2111.11215*, 2021.
- [13] Alex Yu, Sara Fridovich-Keil, Matthew Tancik, Qinhong Chen, Benjamin Recht, and Angjoo Kanazawa. Plenoxels: Radiance fields without neural networks. *arXiv preprint arXiv:2112.05131*, 2021.
- [14] Richard Zhang, Phillip Isola, Alexei A Efros, Eli Shechtman, and Oliver Wang. The unreasonable effectiveness of deep features as a perceptual metric. In *CVPR*, 2018.

## Checklist

### 1. For all authors...

- (a) Do the main claims made in the abstract and introduction accurately reflect the paper’s contributions and scope? [Yes] See Section 1.
- (b) Did you describe the limitations of your work? [Yes] See Section 1.
- (c) Did you discuss any potential negative societal impacts of your work? [Yes] See Section 6.1
- (d) Have you read the ethics review guidelines and ensured that your paper conforms to them? [Yes]

### 2. If you are including theoretical results...

- (a) Did you state the full set of assumptions of all theoretical results? [Yes] We listed our assumptions in section
- (b) Did you include complete proofs of all theoretical results? [Yes] Proofs in section are complete and rely on basic math.

### 3. If you ran experiments...

- (a) Did you include the code, data, and instructions needed to reproduce the main experimental results (either in the supplemental material or as a URL)? [No] But we plan to release code soon, within supplementary materials
- (b) Did you specify all the training details (e.g., data splits, hyperparameters, how they were chosen)? [Yes] See Section 5.2
- (c) Did you report error bars (e.g., with respect to the random seed after running experiments multiple times)? [No] We have rerun our experiments several times and so that results are pretty similar. We plan to continue experiments and made more run with other MLP architectures as well as voxel-based models.
- (d) Did you include the total amount of compute and the type of resources used (e.g., type of GPUs, internal cluster, or cloud provider)? [Yes] See Section 5.2

### 4. If you are using existing assets (e.g., code, data, models) or curating/releasing new assets...

- (a) If your work uses existing assets, did you cite the creators? [Yes] Yes, we cite Pytorch, pytorch3d and NeRF’s creators as well as many other relevant. See Section 5.2
- (b) Did you mention the license of the assets? [No] We use opensource assets and cite/share links to them.
- (c) Did you include any new assets either in the supplemental material or as a URL? [No] But we plan to release code soon, within supplementary materials
- (d) Did you discuss whether and how consent was obtained from people whose data you’re using/curating? [N/A] Not applicable, data is artificially generated
- (e) Did you discuss whether the data you are using/curating contains personally identifiable information or offensive content? [N/A] Not applicable, data is artificially generated

### 5. If you used crowdsourcing or conducted research with human subjects...

- (a) Did you include the full text of instructions given to participants and screenshots, if applicable? [N/A] Not applicable
- (b) Did you describe any potential participant risks, with links to Institutional Review Board (IRB) approvals, if applicable? [N/A] Not applicable
- (c) Did you include the estimated hourly wage paid to participants and the total amount spent on participant compensation? [N/A] Not applicable

## A Appendix

### A.1 Stable Opacity Inversion

To sample a ray point we invert the opacity function  $F(t) = 1 - \exp(-\int_{t_n}^t \sigma_r(s)ds)$ . However, we noticed that a naive inversion with binary search may be unstable. The instabilities are due to the

exponential function squishing the negative integral values from  $(-\infty, 0]$  into  $[0, 1]$ . As an alternative, we propose to invert the integral  $g(t) := \int_{t_n}^t \sigma_r(s)ds$  instead of  $F(t)$ .

To obtain a formula for the inverse opacity, we rewrite  $y = F(t) = 1 - \exp(-g(t))$  as

$$g(t) = -\log(1 - y). \quad (14)$$

Then, we invert  $g(t)$  and end up with the final expression:

$$t = g^{-1}(-\log(1 - y)). \quad (15)$$

In the experiments, we applied the binary search to invert  $g(t)$  rather than  $F(t)$ . The search boundaries were still  $(t_n, t_f)$ .

## A.2 Differentiability Requirements

In our experiments, we use

$$\hat{C}_{SMC}^R(\mathbf{o}, \mathbf{d}) = \frac{1}{m} \sum_{i=1}^m (y_f - y_n) c_r(F^{-1}(y_n + (y_f - y_n)v_i)) \quad (16)$$

as an unbiased estimate of the expected color. To estimate the gradient of the expected color  $\frac{\partial C}{\partial \theta}$  we compute the gradients of Eq. 17. Such an approach is grounded by the Leibniz integral rule, which in turns requires  $F$  to be a differentiable function of  $t$  in each ray point. Next, we argue that a continuous density field satisfies the requirement. The derivative of  $F(t) = 1 - \exp(-\int_{t_n}^t \sigma_r(s)ds)$  is

$$\frac{dF}{dt} = \exp(-\int_{t_n}^t \sigma_r(s)ds) \sigma_r(t) \quad (17)$$

by the fundamental theorem of calculus.

Our approximation evaluates a density field on a ray grid  $t_0 < \dots < t_m$  and construct a linear spline  $\hat{\sigma}_r$ . With a piecewise linear continuous function we end up with continuous derivative  $\frac{dF}{dt}$ .

## A.3 Network Architecture

All our experiments share same network architecture inspired by the original NeRF paper [8]. It is a multilayered perceptron with ReLU activations. Generally speaking, our network uses 3 layers to estimate point density and 5 layers on top of that to predict point color. Fig. 5 illustrates the architecture.

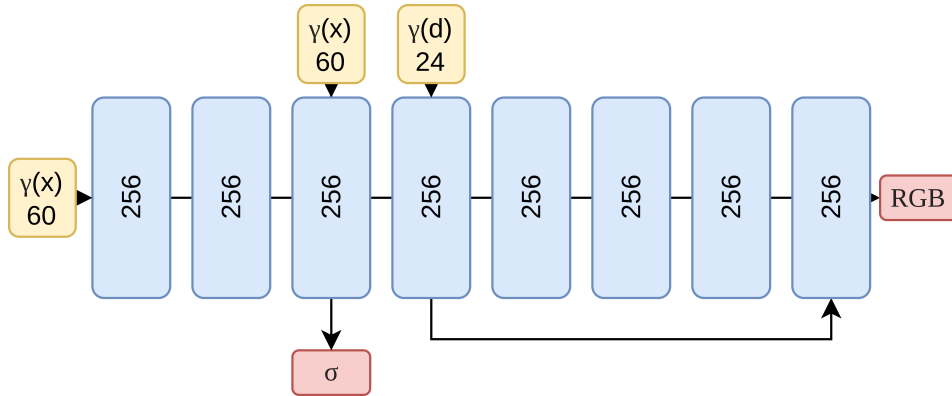

Figure 5: Our network contains 8 layers following the structure of the original NeRF [8]. As we previously mentioned, the main difference is that we only use 3 layers to parameterize the density field  $\sigma$ . We also modify the skip-connections to accommodate the modification. Inputs are shown in yellow, fully-connected layers with ReLU activations shown in blue, each layer has 256 channels.  $\gamma$  is the positional encoding, we add a SoftPlus activation to the sigma output following [2], we parameterize RGB output with a sigmoid activation.
